1 **Metagenomic characterization of creek sediment microbial communities from a major**  
2 **agricultural region in Salinas, California.**

3

4 Brittany J. Suttner<sup>1</sup>, Eric R. Johnston<sup>1,3</sup>, Luis H. Orellana<sup>1</sup>, Luis M. Rodriguez-R<sup>4</sup> Janet K. Hatt<sup>1</sup>,  
5 Diana Carychao<sup>2</sup>, Michelle Q. Carter<sup>2</sup>, Michael B. Cooley<sup>2</sup>, and Konstantinos T.

6 Konstantinidis<sup>1,4\*</sup>

7 <sup>1</sup> School of Civil and Environmental Engineering, Georgia Institute of Technology, Atlanta, GA  
8 30332 USA,

9 <sup>2</sup> Produce Safety and Microbiology, USDA-ARS Western Regional Research Center, Albany,  
10 CA 94710, USA

11 <sup>3</sup> Biosciences Division, Oak Ridge National Laboratory, Oak Ridge, TN 37830, USA

12 <sup>4</sup> School of Biological Sciences, Center for Bioinformatics and Computational Genomics,  
13 Georgia Institute of Technology, Atlanta, GA 30332, USA.

14 \* To whom correspondence should be addressed.

15 Konstantinos T. Konstantinidis,

16 School of Civil & Environmental Engineering,

17 Georgia Institute of Technology.

18 311 Ferst Drive, ES&T Building, Room 3321,

19 Atlanta, GA, 30332.

20 Telephone: 404-639-4292

21 Email: [kostas@ce.gatech.edu](mailto:kostas@ce.gatech.edu)

22

23 **ABSTRACT**

24 Little is known about the public health risks associated with natural creek sediments that are  
25 affected by runoff and fecal pollution from agricultural and livestock practices. For instance, the  
26 persistence of foodborne pathogens originating from agricultural activities such as Shiga Toxin-  
27 producing *E. coli* (STEC) in such sediments remains poorly quantified. Towards closing these  
28 knowledge gaps, the water-sediment interface of two creeks in the Salinas River Valley was  
29 sampled over a nine-month period using metagenomics and traditional culture-based tests for  
30 STEC. Our results revealed that these sediment communities are extremely diverse and  
31 comparable to the functional and taxonomic diversity observed in soils. With our sequencing  
32 effort (~4 Gbp per library), we were unable to detect any pathogenic *Escherichia coli* in the  
33 metagenomes of 11 samples that had tested positive using culture-based methods, apparently due  
34 to relatively low pathogen abundance. Further, no significant differences were detected in the  
35 abundance of human- or cow-specific gut microbiome sequences compared to upstream, more  
36 pristine (control) sites, indicating natural dilution of anthropogenic inputs. Notably, a high  
37 baseline level of metagenomic reads encoding antibiotic resistance genes (ARGs) was found in  
38 all samples and was significantly higher compared to ARG reads in metagenomes from other  
39 environments, suggesting that these communities may be natural reservoirs of ARGs. Overall,  
40 our metagenomic results revealed that creek sediments are not a major sink for anthropogenic  
41 runoff and the public health risk associated with these sediment microbial communities may be  
42 low.

43

## 44 **IMPORTANCE**

45 Current agricultural and livestock practices contribute to fecal contamination in the environment  
46 and the spread of food and water-borne disease and antibiotic resistance genes (ARGs).  
47 Traditionally, the level of pollution and risk to public health is assessed by culture-based tests for  
48 the intestinal bacterium, *E. coli*. However, the accuracy of these traditional methods (e.g., low  
49 quantification, and false positive signal when PCR-based) and their suitability for sediments  
50 remains unclear. We collected sediments for a time series metagenomics study from one of the  
51 most highly productive agricultural regions in the U.S. in order to assess how agricultural runoff  
52 affects the native microbial communities and if the presence of STEC in sediment samples can  
53 be detected directly by sequencing. Our study provided important information on the potential  
54 for using metagenomics as a tool for assessment of public health risk in natural environments.

55

## 56 **INTRODUCTION**

57 Nearly half of the major produce-associated outbreaks in the U.S. between 1995-2006  
58 have been traced to spinach or lettuce grown in the Salinas Valley of California (1).  
59 Contamination of produce can be caused by exposure to contaminated irrigation or flood water,  
60 deposition of feces by wildlife or livestock, or during field application of manure as fertilizer (2,  
61 3). From a public health perspective, more information is needed on the risk of exposure to  
62 animal fecal contamination as recent studies suggest that exposure to water impacted by cow  
63 feces may present public health risks that are similar or equal to human fecal contamination. For  
64 example, cattle are a reservoir of the major foodborne pathogen, Shiga Toxin-producing *E. coli*  
65 (STEC) (4, 5). Environmental contamination by animal feces from farms is an emerging public

66 health issue not only as a source of pathogens but also as a source of antibiotic resistance genes  
67 (ARGs) (6). Antibiotics are regularly administered to livestock at prophylactic concentrations to  
68 prevent infection, and food animal production is responsible for a significant proportion of total  
69 antibiotic use (7). Such practices are known to contribute to the prevalence of ARGs in the  
70 environment (8–10), which can spread rapidly to other microbes via horizontal gene transfer,  
71 including to human pathogens of clinical importance (11, 12). Surprisingly, there is very little  
72 regulation of antibiotic use in the livestock industry, even though these operations can be major  
73 contributors to fecal pollution and the spread of ARGs in the environment (13, 14).

74 Our previous culture- and PCR-based surveys of the Salinas watershed, and particularly  
75 Gabilan and Towne Creeks (heretofore called GABOSR and TOWOSR, respectively), indicated  
76 persistent presence of STEC in water and sediments (15, 16) and a potentially significant public  
77 health risk. Continued prevalence of STEC in both GABOSR and TOWOSR sites is  
78 hypothesized to be linked to the presence of cattle upstream. For instance, in several cases, STEC  
79 strains isolated from cattle fecal samples were identical to those found in water and sediment  
80 based on Multi-Locus Variable number tandem repeat Analysis (MLVA) typing. Indeed, the  
81 prevalence of STEC was strongly correlated with runoff due to rainfall (1, 16). However,  
82 hydrologic modeling and surveys indicated that pathogen levels in streams were not only due to  
83 overland flow, but also to contributions from sediment (17, 18). These observations were further  
84 supported by several examples of identical MLVA types isolated from both water and sediment  
85 at the same location or downstream during periods of drought (1, 15). Further, the levels of  
86 pathogen in the water column and sediment are difficult to measure and are generally  
87 underestimated due to the predominance of biofilms and viable but not culturable (VBNC)  
88 bacteria (19). Therefore, metagenomic characterization of the creek sediments should provide

89 independent quantitative insights into the effect of agricultural practices on the surrounding  
90 environment.

91 River and creek sediments are among the most diverse communities sequenced to date and are  
92 largely under-sampled (20, 21). Moreover, the sediments studied to date are exclusively from  
93 highly and/or historically polluted environments with varying industrial or sewage inputs and  
94 thus, each sediment is characterized by its unique properties in terms of flow dynamics, chemical  
95 environment, climatic conditions and anthropogenic inputs (21–27). Accordingly, previous  
96 studies on the effect of anthropogenic inputs on sediments in lotic (free-flowing) aquatic systems  
97 have yielded mixed results on how surrounding land use practices impact sediment communities  
98 or were not directly relevant. Furthermore, in order to properly quantify the effect of  
99 anthropogenic antibiotic inputs, appropriate controls (e.g., pristine sampling sites) are needed to  
100 determine baseline levels of ARGs and other genes (13, 28).

101

102 In this study, we examined the effect of agricultural runoff on microbial communities from creek  
103 sediments in the Salinas watershed and whether community structure correlated with  
104 precipitation or culture-based detection of STEC. We sampled nearby, upstream sites with  
105 reduced human and cattle presence as a baseline to compare the abundance of anthropogenic  
106 signals (i.e. human and cow gut microbiome and ARGs) observed in the downstream sites.  
107 Furthermore, we compared these sites to other publicly-available sediment, soil, and river water  
108 metagenomes from both highly pristine and polluted environments in order to validate our results  
109 and assess anthropogenic pollution levels relative to other similar habitats.

110

## 111 **RESULTS**

## 112 **Description of sampling sites**

113 Six sites from three creeks in the Salinas River valley in California were included in this study.  
114 Two of the sites (collectively referred to as the “downstream” samples/sites) are impacted by  
115 cattle ranching but vary in the level of agricultural activities in the directly surrounding area. The  
116 creeks are isolated at the sampling locations but converge further downstream before emptying  
117 into the Salinas River. Gabilan (GABOSR) is directly downstream of organic strawberry produce  
118 fields that use both green and poultry manure fertilizer and has cattle ranching upstream of the  
119 strawberry farm. The second site, Towne Creek (TOWOSR), is roughly 2 Km north of GABOSR  
120 but does not have any abutting agricultural fields directly upstream and only receives input from  
121 cattle ranches. Ten samples from each of the two downstream sites, GABOSR and TOWOSR,  
122 collected over a 9-month period from September 2013 through June 2014 were selected for  
123 metagenome sequencing based on precipitation levels and detection of pathogenic *E. coli* via  
124 enrichment culture (Table 1). An additional seven samples from four upstream sites (collectively  
125 referred to as the “upstream” samples/sites), were included to serve as upstream controls for  
126 metagenomic comparison (Table 1 and Figure 1). The samples from these locations included:  
127 three samples collected ~10 km upstream from Gabilan (“GABOSR Control”) on March 2016  
128 (GC1-3); two samples collected ~3 km upstream from Towne Creek (“TOWOSR Control”) on  
129 April 2017 (TC1 and TC2); and finally, one sample from each of two sites on the west side of the  
130 Salinas River (“West Salinas”), ~60 km and 110 km southeast from the downstream sites  
131 collected in May 2017 (WS1 and WS2, respectively). The latter two samples are not upstream of  
132 GABOSR or TOWOSR but were included because they are more pristine sites with no known  
133 history of cattle impact, as opposed to the GC and TC samples, which may have had minimal  
134 inputs from previous cattle grazing.

135

## 136 **Description of metagenomes and sequence coverage of microbial community**

137 A total of 27 metagenomic samples, ranging in size from 8.7 to 20.1 million reads (2.5 to 5 Gbp)  
138 after trimming, were recovered from the six locations (Table S2). For all samples, less than 28%  
139 of the total community (average 18.6%) was covered by our sequencing efforts as determined by  
140 Nonpareil analysis (Figure S1). Consequently, the assembly of the metagenomes was limiting  
141 (Table S2), consistent with our previous analysis of soil and sediment communities (29) and  
142 those of a few other metagenomic studies of river sediments. Thus, an un-assembled short read-  
143 based strategy was used for all subsequent analyses (paired-end, non-overlapping reads with an  
144 average length of 132-145 bp per dataset), unless noted otherwise. A total of  $7.2 \times 10^8$  protein  
145 sequences were predicted from the short reads, with an average of  $2.7 \times 10^7$  sequences per sample.  
146 The number of protein sequences that could be annotated to the Swiss-Prot database in each  
147 sample ranged between 10 and 16% (average 14.5%) of the total sequences.

148

## 149 **OTU characterization and alpha diversity assessment**

150 A total of 466,421 reads encoding fragments of the 16S or 18S rRNA gene were detected in all  
151 27 metagenomes with an average of 17,275 reads per sample. All datasets were dominated by  
152 bacteria, with only 0.6% and 3.0% of the total rRNA reads, on average, having archaeal or  
153 eukaryotic origin, respectively. Closed-reference OTU picking at 97% nucleotide identity  
154 threshold resulted in a total of 25,764 OTUs from 349,886 reads for all 27 samples and an  
155 average of 4,465 OTUs per sample. Since the coverage was similar for all datasets, the number  
156 of OTUs shared between all samples were compared without any further normalization. Only

157 138 OTUs (0.5%) were shared among all 27 samples, while 9,500 (36.9%) of the OTUs were  
158 present in only one sample. The OTU rarefaction plot showed that diversity was not saturated  
159 (Figure S2A), which agreed with the low number of shared OTUs and the Nonpareil estimates on  
160 the shotgun data reported above (Figure S1).

161 Alpha diversity observed in the California samples was compared to three publicly-available  
162 river sediment metagenomes from Montana that had similar land use inputs (i.e. agricultural or  
163 small towns) and were the most appropriate data for comparison among lotic sediment  
164 metagenomes currently available (20). Species richness and diversity in Montana samples were  
165 significantly less than California samples ( $P= 2.3 \times 10^{-4}$  and 0.006, respectively; Figure S2).  
166 Within California sites, diversity and evenness were similar; however, average species richness  
167 in GABOSR was significantly lower than TOWOSR and the upstream samples ( $P= 0.034$  and  
168  $4.1 \times 10^{-4}$ , respectively).

### 169 **Taxonomic composition and functional diversity of water-sediment microbial communities**

170 OTUs were analyzed further to characterize the taxonomic profile of the communities sampled.  
171 *Proteobacteria* and *Bacteroidetes* were the most abundant phyla across most samples. However,  
172 some of the upstream samples had a higher abundance of *Actinobacteria* (Figure S3A). Class  
173 level taxonomic distributions were consistent over time for GABOSR samples and revealed the  
174 high abundance of *Betaproteobacteria* (>19-24% of total sequences). TOWOSR samples varied  
175 more over time; five samples (T130918, T131230, T140128, T140210, T140611) had a higher  
176 abundance of *Deltaproteobacteria* and *Bacteroidia*, and one sample (T140116) had a higher  
177 abundance of *Cyanobacteria*. The upstream samples also showed a similar community  
178 composition and had higher relative abundance of *Alphaproteobacteria* (11-17%) compared to



179 the downstream samples (Figure S3B). These results were consistent with the TrEMBL  
180 taxonomic classification of protein-coding metagenomic reads, which were dominated by  
181 *Bacteria* (~95.2% per sample; Figure S4).

182

### 183 **Microbial community structure and dynamics in Salinas River valley creeks**

184 Location was the strongest factor affecting clustering patterns observed in PCA ordinations of all  
185 distance matrices analyzed (Figure S5). ADONIS analysis in the R package vegan (using  
186 location as a categorical variable) yielded  $P < 0.001$  and  $R^2 = 0.44, 0.67, 0.41,$  and  $0.56$  for  
187 MASH, functional gene, OTUs Bray-Curtis (16S-BC) and OTUs weighted UniFrac (16S-WUF),  
188 respectively. This result was confirmed by correlation analysis of the NMDS ordinations to all  
189 metadata variables using the envfit function in vegan. After Bonferroni correction for multiple  
190 comparisons, location had the strongest correlation to all ordinations (MASH:  $P = 0.001,$   
191  $R^2 = 0.879;$  Functional gene:  $P = 0.001, R^2 = 0.845;$  16S-BC:  $P = 0.001, R^2 = 0.787;$  16S-WUF:  
192  $P = 0.001, R^2 = 0.726$ ), and was the only significant variable for MASH (Figure 2) and 16S rRNA  
193 gene-based measures of beta-diversity (Figures S6, panels B and C) among those parameters  
194 evaluated. The functional gene ordination was also correlated, albeit weakly, to total 5-day  
195 precipitation ( $P = 0.028, R^2 = 0.359;$  Figure S6A). In order to control for spatial variance, a more  
196 rigorous db-RDA (30) was used on constrained NMDS ordinations, which allows the influence  
197 of a matrix of conditioning variables (i.e., location) to be “removed” prior to analysis. No  
198 significant associations ( $P > 0.05$ ) were found in the functional gene and OTU Bray-Curtis  
199 ordinations, however, the MASH and OTU weighted UniFrac distances were significantly  
200 associated with sampling time (ANOVA:  $F = 1.274, P = 0.031;$   $F = 2.174, P = 0.04,$  respectively).

201

## 202 **Culture-based detection of *E. coli* does not correlate with metagenome-based results**

203 The abundance of *E. coli* in the metagenomes was low for all samples (~0.002% of total reads).  
204 Samples with the highest relative abundance of metagenomic reads matching to *E. coli* were  
205 negative for all culture-based tests (Table S3), which indicated spurious *in-silico* results (e.g.,  
206 reads from non-*E. coli* genomes matching to conserved genes such as the rRNA operon). In  
207 addition, when using imGLAD (31) to predict the probability that *E. coli* was present in the  
208 metagenomes, a tool developed by our team to deal with spurious matches, all samples yielded a  
209 P-value of 1 (i.e., 0 probability of presence), which suggested that any *E. coli* populations  
210 (including STEC) were below the estimated limit of detection for the datasets in hand (3%  
211 coverage of *E. coli* genome at a minimum of 0.12 sequencing depth). The absolute abundance of  
212 the STEC based on ddPCR was also low (~1 in 10<sup>8</sup> cells, assuming average molecular weight of  
213 a bp of DNA is 660g/mol, 5 Mb genome size, and 1 copy *stx*/genome) or absent in all samples,  
214 which supports our bioinformatic approaches (Table S3).

215

## 216 **Differentially abundant (DA) functions and taxa between locations**

217 Of the 1,105 SEED subsystems (pathways) and 1806 taxonomic groups identified, 911 and 408  
218 were significantly DA with  $P_{\text{adj}} < 0.05$  for subsystems and taxa, respectively. Using pairwise  
219 comparisons between GABOSR, TOWOSR, and upstream sites, 184 SEED subsystems had Log<sub>2</sub>  
220 fold change (L2FC) > 1, while 273 taxa had L2FC > 2, which were grouped into 36 and 35  
221 broader functional and taxonomic categories, respectively (as described in the supplementary  
222 data). This analysis revealed several notable trends that were consistent between the SEED and

223 taxa results (Figures 3 and S7). More specifically, iron acquisition genes appeared to more  
224 abundant in the upstream samples, particularly in the samples collected upstream of TOWOSR  
225 (TC1 and TC2). Plant-associated and photosynthesis genes were more abundant in the more  
226 pristine samples (WS1 and WS2). Consistently, members of the phyla, *Alphaproteobacteria* (e.g.  
227 *Rhizobiales*; see Supplementary data file S2), were more abundant upstream. The upstream sites  
228 were also DA for taxa that are associated with soil and aquatic habitats (e.g. *Gemmatimonadetes*  
229 and *Armatimonadetes*), which indicated that these sites may indeed receive less anthropogenic  
230 inputs, as we hypothesized.

231 Sample T140116 was enriched for both cyanobacteria based on OTU analysis (Figure S7) and  
232 photosynthesis genes (Figure 3). TOWOSR appeared to be DA in genes for anaerobic processes  
233 like anoxygenic photosynthesis and methanogenesis, along with genes related to archaeal DNA,  
234 RNA, and protein metabolism (all organisms known to carry out methanogenesis are *Archaea*).  
235 Consistently, the two TOWOSR samples (T140128 and T140210) that were most DA for  
236 archaeal and methanogenesis genes were also the most DA in *Archaea* and methanotrophs from  
237 the order *Methylococcales*, relative to the other sites. Other DA genes associated with anaerobic  
238 metabolisms, such as anoxygenic photosynthesis and sulfur metabolism genes (Figure 5), were  
239 congruent with taxonomic results that showed anoxygenic photosynthetic phyla *Chlorobi* (Green  
240 S bacteria), *Chloroflexi* (Green non-S), and the family *Chromatiaceae*, as well as known sulfur-  
241 metabolizing and anaerobic groups (e.g. *Thiobacillus* and *Clostridia*) to be more prevalent in the  
242 TOWOSR samples (Figure S7). Additionally, the TOWOSR samples, in general, were more  
243 abundant in the gut-associated phyla, *Firmicutes* and *Bacteroidetes*. Sample T140210 from  
244 TOWOSR was particularly enriched in specific enteric taxa: *Endomicrobia* and *Fibrobacteres*,  
245 which are rumen bacteria associated with cellulous degradation.

246 Collectively, these results suggested that our annotation and grouping methods were robust and  
247 that TOWOSR samples are more anaerobic, which could potentially indicate greater runoff and  
248 eutrophication as a result of human activity at this location. Also, the upstream sites were all  
249 significantly DA in *Actinobacteria* (i.e., common soil microbes and antibiotic producers), which  
250 provides further evidence in support of this system being a natural (and substantial) source of  
251 ARGs (see below).

252

### 253 **Quantifying anthropogenic and agricultural inputs**

254 *ARGs are more abundant in California samples compared to other similar environments.* The  
255 abundance of ARGs in each dataset was determined by blastp search against the Comprehensive  
256 Antibiotic Resistance Gene Database (CARD; (32)). The most abundant ARGs detected are  
257 shown in Figure S8. A comparison of selected metagenomic datasets that included:  
258 metagenomes from agricultural sediments from Montana (MT) and soils from Illinois (Urb,  
259 Hav), more pristine/remote samples from the Kalamas River (Kal) and Alaskan permafrost (AK),  
260 as well as a highly polluted sample from the Ganges River (Agra), was performed in order to  
261 benchmark the level of anthropogenic signal observed in the Salinas Valley against other  
262 environments. The abundance of ARGs in the California samples were significantly greater  
263 compared to the other environmental metagenomes included here (Kruskal-Wallis  $\chi^2 = 19.44$ ,  $P =$   
264 0.0002; Figure 4A).

265 *Abundance of genes associated with antibiotics used in cattle.* In order to better assess the impact  
266 (if any) of ARGs related to cattle ranching, we built ROcker models, a more accurate approach  
267 for finding metagenomic reads encoding a target gene of interest compared to simple homology

268 searches (33), targeting tetracycline resistance (*tetM*) and production gene (*oxyT*) since  
269 tetracyclines are among the most common antibiotics used in livestock (34). We also built a  
270 model targeting ketosynthase alpha subunit genes (*KSa*), which are involved in the synthesis of  
271 many antibiotics, including tetracyclines (35). In order to exclude the effect of potentially  
272 confounding variables, only the California samples were used for linear regression analysis of  
273 the abundances of antibiotic production and resistance genes. ROcker analysis showed high  
274 prevalence of *tetM* in all samples and an abnormally high abundance for *tetM* was observed in  
275 sample TC1 (Figure 5, left panel). TC1 was thus considered an outlier and excluded from the  
276 linear regression analysis. The high abundance in TC1 was attributed to the fact that *tetM* has the  
277 widest host range of all tetracycline resistance (*tet*) genes due to its association with highly  
278 mobile conjugative transposons that behave similarly to plasmids and have several antirestriction  
279 systems (36, 37). *OxyT* did not significantly correlate to *tetM* abundance ( $r^2=0.031$ ); however,  
280 *KSa* showed a moderate correlation to *tetM* ( $r^2=0.280$ ) (Figure 5, right panel).

281 *Abundance of cow and human gut (HG) microbiomes.* The signal from the Ganges River (Agra)  
282 sample greatly exceeded all other samples in both the absolute number (Table S4) and relative  
283 abundance expressed as genome equivalents (GE), i.e., the fraction of total genomes encoding  
284 human gut genes assuming a single-copy of each gene per genome (33.5 GE; 8-100x more  
285 abundant than all other samples; Figure 4B). There was a significant difference between the HG  
286 abundance averages observed in California metagenomes and the 8 metagenomes from 5 other  
287 habitats evaluated here (Kruskal-Wallis  $P=0.015$ ). However, after correcting for multiple  
288 comparisons, none of the groups were significantly different (Wilcoxon Rank Sum  $P > 0.1$ ).  
289 Within California samples, there was no significant difference, overall, between abundances

290 observed in the downstream samples and the average abundances of the upstream control  
291 samples (Kruskal-Wallis  $P=0.169$ ).

292 The abundance of different cow gut genes had a similar trend to the human gut data (Table S4).  
293 However, two samples from TOWOSR (T140210 and T140611) showed an elevated signal for  
294 cow sequences (Figure 4C). Despite these two samples from TOWOSR with a higher level of  
295 cow gut signal, the average gene abundances were similar for California samples overall, and no  
296 significant difference was detected between the means compared to the other environmental  
297 metagenomes and the seven upstream control samples (Kruskal-Wallis  $P=0.090$ ; Figure 4C).

298

## 299 **DISCUSSION**

300 Analyses of river planktonic communities over time and land use have shown that these  
301 communities vary by average genome size, location, amount of sunlight, and nutrient  
302 concentrations (38) as well as by sampling time more so than space (39). However, the results  
303 presented here suggested that community composition of Salinas Valley creek sediments are  
304 structured primarily by spatial separation, and the local weather parameters tested here did not  
305 have a significant effect (Figure 2). More detailed *in-situ* metadata than those obtained here such  
306 as nutrient concentrations (e.g. organic carbon and biological oxygen demand) are needed in  
307 order to discern the processes that are driving community diversity and structure within each  
308 Salinas Valley site. For example, anaerobic taxa and processes related to methane and sulfur  
309 metabolism and anoxygenic photosynthesis were significantly more abundant in TOWOSR  
310 (Figure 3 and supplemental material), which suggests higher eutrophication from agricultural

311 run-off or higher primary productivity by phototrophs, which was not reflected by the local  
312 weather parameters measured.

313 We compared abundances of reads annotated as ARG, human or cow gut in order to assess levels  
314 of anthropogenic impacts on Salinas Valley creek sediment communities. No significant  
315 difference was detected between the downstream samples and the upstream controls for any of  
316 the three anthropogenic indicators (Figure 4), which suggested that the land use practices  
317 surrounding the creeks does not have a lasting impact on the natural community and the inputs  
318 are likely diluted or attenuated faster than the intervals sampled here. We then benchmarked  
319 abundances observed in the creek sediments from this study against metagenomes from other  
320 environments. These included agricultural sediments and soils, permafrost, and river water from  
321 both pristine and polluted habitats. GABOSR, TOWOSR, and the upstream samples all had  
322 significantly higher ARG abundances compared to the average of the other environments tested  
323 here (Figure 4A). This high background level of reads annotated as ARGs suggested that the  
324 Salinas Valley creek sediments are a natural reservoir for these genes. Furthermore, resistance  
325 genes to synthetic antibiotics such as florfenicol (*fexA* and *floR*) and ciprofloxacin (*qnrS*), one of  
326 the most widely used antibiotics in humans worldwide, were absent or detected in very low  
327 abundance (less than 10 reads matching) in our datasets. Spurious matches to conserved gene  
328 regions can occur when analyzing short reads like the ones here, but the signal was not large  
329 enough to warrant further investigation using precise and targeted methods (e.g. ROCKER).  
330 Overall, the absence of resistance genes to more recently introduced, synthetic antibiotics  
331 provides further evidence that the ARG signal observed in the Salinas Valley is likely  
332 autochthonous in origin. Future studies could involve deeper sequencing (higher community  
333 coverage) in order to recover long contigs and thus, determine the genomic background of the

334 ARGs and if they are associated with mobile elements or plasmids for improved public health  
335 risk assessment. Still, these results highlight the importance of having a baseline or “pristine”  
336 sample to discern anthropogenic from naturally-occurring ARGs and have important  
337 implications for monitoring the spread of ARGs in the environment. For instance, without the  
338 upstream control samples, this study could have (speciously) concluded that GABOSR and  
339 TOWOSR are elevated in ARGs as a result of cattle ranching. However, the similar abundances  
340 found in the upstream samples indicated that the signal detected downstream could be inherent to  
341 this environment and that a more targeted analysis of specific ARGs was required to determine if  
342 the effect of cattle could be detected.

343 Tetracycline resistance genes have been shown to increase with and correlate to anthropogenic  
344 inputs along a river estuary system (40), suggesting that they can be useful indicators of  
345 anthropogenic pollution. However, tetracycline resistance genes are also found in other pristine  
346 or natural environments (28, 41–43), and therefore can also be considered part of the  
347 autochthonous gene pool in some habitats. Here, we tested the hypothesis that if tetracycline  
348 resistance genes are naturally occurring, the production enzymes for tetracycline should also  
349 follow similar abundance patterns, as antibiotic resistance and biosynthesis genes are often  
350 encoded on the same operon to ensure antibiotic-producing species are resistant to the product  
351 they synthesize (44). Thus, we expected to see a correlation between abundances of the  
352 tetracycline resistance gene, *tetM*, and its associated production genes (*oxyT*, *KSα*) if this system  
353 is not under heavy selection pressure of human-introduced antibiotics. The abundance of *tetM* in  
354 the Salinas Valley creek sediments was not correlated to *oxyT* and only moderately correlated to  
355 *KSα* (Figure 5). *OxyT* had very low abundance (less than 8 reads matching per sample), which  
356 suggested that the lack of correlation to *tetM* could be due to database limitations. That is, only a



357 few reference *oxyT* genes are publicly available (13 sequences) and these likely do not capture  
358 the total diversity of this gene found in the environment. *KS $\alpha$* , on the other hand, represents a  
359 broad class of synthesis genes for many different antibiotics with many more sequences in the  
360 reference databases and thus, a better estimate of antibiotic production potential was obtained  
361 based on these genes. Overall, these findings further supported that this ecosystem is a natural  
362 reservoir for ARGs, and the presence of tetracycline resistance is not likely to be caused by  
363 inputs from the cattle ranches. However, future investigations could involve additional antibiotic  
364 production gene references for more robust conclusions.

365 When compared to the other pristine or rural environmental metagenomes such as agricultural  
366 sediments and soils, permafrost, and river water, the abundances of reads annotated as human  
367 gut in the California sediments were not significantly different overall. However, the Ganges  
368 River (Agra) sample, collected from one of the most densely populated and highly polluted areas  
369 surrounding the river (Agra, Uttar Pradesh, India), was 1-2 orders of magnitude more abundant  
370 for human gut, compared to the rest of the samples used in our study (Figure 4B). Thus, a high  
371 human gut signal was expected for the Ganges River, consistent with previous results (45) and  
372 served as a reference to assess relative levels of human fecal contamination. The rest of the  
373 samples included in our comparisons were from rural/agricultural or more remote areas, with  
374 lower population density, and consistently had lower signals of human fecal contamination than  
375 the Agra sample. Therefore, the abundances of human gut sequences observed in Salinas Valley  
376 were consistent with the lower levels of human activity/density input relative to the other sites  
377 used for comparison here and indicated that our annotation and filtering methods were robust.  
378 Collectively, these results showed that metagenomics of river/creek sediments provide a reliable

379 means for assessing the magnitude of the human presence/activity, consistent with recent studies  
380 of other riverine ecosystems (39, 45).

381 Contrary to the results for human gut, the abundances of cow gut signal in the California samples  
382 were not consistent with our expectations. The TOWOSR and GABOSR sites are directly  
383 downstream of large cattle ranch operations and identical pathogen recovery from water and  
384 upstream cattle indicated the cattle ranches were the source of fecal contamination (1). As such,  
385 we expected to see a higher level of cow signal in the downstream metagenome samples, yet the  
386 abundance was not significantly different from the other environments or the upstream controls  
387 (Figure 4B&C). Notably, two of the samples from TOWOSR (T140210 and T140611) showed  
388 elevated signal for cow that was similar to the abundance observed in the highly polluted Ganges  
389 River reference metagenome (Figure 4C). These samples (especially T140210) had a higher  
390 abundance of the rumen enteric and cellulose degrading taxa (*Endomicrobia* and *Fibrobacteres*;  
391 Figure S7), which supports the conclusion that these samples contained run-off from cattle,  
392 however the signal might be patchy or muted in the sediment and require more frequent  
393 sampling and/or larger sampling volumes than those used here to detect these signals.

394 Additionally, we were unable to detect any *E. coli* populations in any of the metagenomes,  
395 including samples that were positive for STEC via enrichment culture, indicating that it is not an  
396 abundant member of the sediment community (Table S3). This was consistent with imGLAD  
397 estimates that the sequencing effort applied to our metagenomes imposed a limit of detection for  
398 *E. coli*, and ddPCR results that showed abundance of STEC was low or absent in all samples.  
399 Overall, these results suggested that using shotgun metagenomics may not be sensitive (or  
400 economical) enough as a monitoring tool to detect a relatively low abundance microorganism in  
401 lotic sediments at the level of sequencing effort applied here, which was insufficient partly

402 because of the extremely high community diversity (Figure S1). More than the 2.5 to 5  
403 Gbp/sample sequencing effort applied in this study would have been required to detect ~10 *E.*  
404 *coli* cells in a sample according to our estimates, which is not economical based on current  
405 standards and costs. More specifically, obtaining the imGLAD minimum threshold of 0.12x  
406 coverage for an STEC genome (5 Mbp) in our metagenome libraries (average 4 Gbp), would  
407 require 0.6 Mbp of STEC reads, or 0.015% of the total metagenome, which translates to a  
408 relatively large number of cells *in situ*. For example, assuming  $10^8$  total cells/g of sediment, it  
409 would require  $\sim 10^4$  STEC cells/g of sediment to robustly detect in the metagenomes (or 100  
410 times more sequencing for detecting ~10 cells/g). Thus, the limit of detection of metagenomics,  
411 as applied here, was not low enough and should be combined with methods that offer lower  
412 detection limits and more precise counts (such as ddPCR).

413 Rivers are highly dynamic ecosystems and therefore subject to higher random variation and  
414 sampling artifacts that likely affect the dilution of the exogenous (human) input. Further, our  
415 samples represent relatively small volumes of sediment (~10 g) and the resulting metagenomic  
416 datasets did not saturate the sequence diversity in the DNA extracted from these samples (Figure  
417 S1), which might introduce further experimental noise and stochasticity. Despite these technical  
418 limitations, our data consistently showed little evidence that agricultural or cattle ranching  
419 activities have a significant effect on the creek sediment microbial communities. The underlying  
420 reason for these results remains speculative but should be the subject of future research in order  
421 to better understand the impact of these activities on the environment. Additionally, the level of  
422 functional and taxonomic diversity, as well as the sample heterogeneity (especially in  
423 TOWOSR), suggested that shorter intervals between sampling as well as *in situ* geochemical  
424 data are needed to elucidate the fine scale processes driving the community composition within

425 each location. Although the continued presence of STEC in Salinas watershed sediments is a  
426 public health risk, we did not find evidence that runoff from human activities has a substantial  
427 effect on the sediment microbial community when compared to more pristine sites. An  
428 imperative objective for public health is to assess how and where current agricultural practices  
429 impact the environment in order to determine best practices. The work presented here should  
430 serve as guide for sampling volumes, amount of sequencing to apply, and what bioinformatics  
431 analyses to perform on the resulting data for future public health risk studies of river water and  
432 sediment habitats. Finally, the ROcker models developed here for tetracycline resistance and  
433 production genes should be useful for robustly examining the prevalence of these genes in other  
434 samples and habitats.

435

## 436 **Acknowledgements**

437 This work was supported by the USDA (award 2030-42000-050-10), the US National Science  
438 Foundation (awards No 1511825 and 1831582 to KTK) and the US National Science Foundation  
439 Graduate Research Fellowship under Grant No. DGE-1650044. The funding agencies had no  
440 role in the study design, data collection and analysis, decision to publish, or preparation of the  
441 manuscript.

442

## 443 **MATERIALS AND METHODS**

### 444 **Sample collection and enrichment method for STEC**

445 Sediment samples were collected from watersheds at public-access locations (Table S1).  
446 Weather information was downloaded from the California Irrigation Management Information  
447 System database (<http://ipm.ucanr.edu/calludt.cgi>) for the day of and five days prior to the  
448 sampling day from the closest monitoring station to the downstream sites (Table 1). Sediment  
449 was suspended into the water column using a telescoping pole and approximately 250 mL of  
450 sample (suspended sediment and water) was collected immediately in a sterile bottle. All  
451 samples were transported on ice and processed within 24 hours. DNA from 10 g of resuspended  
452 sediment/water mix was purified for sediment DNA using MoBio PowerSoil DNA extraction kit,  
453 following the manufacturer's protocol. A separate 100 mL of the sample was used for  
454 enrichment and isolation of STEC as previously described (15).

#### 455 ***PCR-based quantification method for STEC***

456 Droplet digital PCR (ddPCR, BioRad) was performed on sediment DNA following the method  
457 of Cooley et al. (19). Each 20  $\mu$ L reaction used 10  $\mu$ L BioRad's Supermix for Probes, 2  $\mu$ L  
458 primer (0.3 $\mu$ M final concentration) and probe (0.2 $\mu$ M), up to 1  $\mu$ g DNA, 1.2  $\mu$ L MgCl<sub>2</sub>  
459 (1.5mM), and 0.2  $\mu$ L HindIII (0.2 U/ $\mu$ L). Primer and probe sequences were as previously  
460 published for STEC (19). Droplets were created with Droplet Generation Oil for Probes in the  
461 QX-200 droplet generator (BioRad), and amplified for 5min at 95°C, 45 cycles at 95°C for 30 s  
462 and 60°C for 90 s, then 5min at 72°C and 5min at 98°C. Droplets were processed with the QX-  
463 200 Droplet reader and template levels were predicted by QuantaSoft software version 1.7.4  
464 (BioRad).

#### 465 **DNA sequencing and Bioinformatics sequence analysis**

466 *Metagenomic sequencing and community coverage estimates*: Shotgun metagenomic sequencing  
467 libraries were prepared using the Illumina Nextera XT library prep kit and HiSEQ 2500  
468 instrument as described previously (46). Short reads were passed through quality filtering and  
469 trimming as described previously (47). Average community coverage and diversity were  
470 estimated using Nonpareil 3.0 (29) with kmer kernel and default parameters. Sequences were  
471 assembled with IDBA (48) using kmer values ranging from 20 to 80.

472 *Taxonomic analysis of rRNA gene-encoding sequences*: Metagenomic reads encoding short  
473 subunit (SSU) rRNA genes were extracted with Parallel-Meta v.2.4.1 using default parameters  
474 (49). Closed reference OTU picking at 97% nucleotide identity with taxonomic assignment  
475 against the GreenGenes database (19) was performed using MacQiime v.1.9.1 (51) with the  
476 reverse strand matching parameter enabled and the uclust clustering algorithm (52). Alpha  
477 diversity was calculated as the true diversity of order one (equivalent to the exponential of the  
478 Shannon index) and corrected for unobserved species using the Chao-Shen correction (53) as  
479 implemented in the R package entropy (54). Richness was estimated using the Chao1 index (55),  
480 and evenness was calculated from the estimated values of diversity divided by richness.  
481 Significant differences in taxonomic diversity, evenness, and richness were assessed using two-  
482 sided t-tests. Multiple rarefactions were performed on OTU tables as implemented in MacQiime  
483 v.1.9.1 (rarefying up to the minimum number of counts per sample: option -e 5,596).

484 *Determination of the total community bacterial fraction*: In order to determine whether bacterial  
485 gene abundances need be corrected for relative bacterial fraction in the total metagenome  
486 libraries, the relative abundance of *Bacteria*, *Archaea*, and *Eukarya* was estimated in each  
487 dataset by searching a subset ( $\sim 1 \times 10^5$  reads per sample) of randomly selected protein coding  
488 reads against the TrEMBL database ((56); downloaded May 2018) using DIAMOND blastx

489 v.0.9.22.123 (57) with the "--more sensitive" option and e-value cutoff of  $1 \times 10^{-5}$ . The TrEMBL  
490 IDs for best hit matches were summarized at the domain level using custom scripts and the  
491 metadata files available at

492 [ftp://ftp.uniprot.org/pub/databases/uniprot/current\\_release/knowledgebase/taxonomic\\_divisions/](ftp://ftp.uniprot.org/pub/databases/uniprot/current_release/knowledgebase/taxonomic_divisions/)

493 No significant difference in the relative abundance of *Bacteria* was found between the different  
494 samples, thus no correction for bacterial fraction was applied to gene abundance calculations.

495 *Functional and ARG annotation of metagenomic sequences:* Protein prediction was performed  
496 using FragGeneScan adopting the Illumina 0.5% error model (58). Resulting amino acid  
497 sequences were searched against the Swiss-Prot (downloaded June 2017) (56) and  
498 Comprehensive Antibiotic Resistance gene (CARD, downloaded May 2017; 26) databases using  
499 blastp (59) for functional annotation. Best matches to the Swiss-Prot database with >80% query  
500 coverage, >40% identity and >35 amino acid alignment length were kept for further analyses. A  
501 more stringent cut off was used for best matches to the CARD (>40% identity over >90% of the  
502 read length) to minimize false positive matches.

503 *Detection of cow and human gut microbiome associated sequences:* Searches for cow gut  
504 associated sequences were performed using our own collection of cow fecal metagenomes from  
505 six cow individuals collected in Georgia, USA. DNA extracted from cow fecal material  
506 underwent the same library prep, DNA sequencing and quality trimming and processing as  
507 described above. Short reads for both the cow gut and CA sediment metagenomes have been  
508 deposited to the SRA database (submission IDs: PRJNA545149 and PRJNA545542,  
509 respectively). Predicted genes (as nucleotides) from all six individual cows were pooled together  
510 and de-replicated at 95% identity using the CD-HIT algorithm (Options: -n 10, -d 0; (60))  
511 resulting in 459,176 non-redundant cow gut metagenome "database" sequences. Human gut-

512 associated sequences were assessed based on comparisons of short-reads against the Integrated  
513 Gene Catalog (IGC) of human gut microbiome genes (61), heretofore referred to as Human Gut  
514 Database (HG) for clarity. The abundance of cow and human gut signal in the short-read  
515 metagenomes was determined based on the number of reads from each dataset matching these  
516 reference sequences using blastn v2.2.29 with a filtering cut off of >95% identity and >90%  
517 query length coverage.

518 *Abundance of specific antibiotic resistance (ARG) and production genes using ROcker:*

519 Dynamic filtering cut-off models targeting a tetracycline resistance gene (*tetM*) and two  
520 antibiotic production genes (*oxyT* and *KSα*) were designed with ROcker v1.3.1, as previously  
521 described (33). Reference sequences for model building were manually selected from public  
522 databases and models were built for 150bp reads and default parameters. The reference  
523 sequences and ROcker models are available at <http://enve-omics.ce.gatech.edu/rocker/models>.  
524 Short reads were searched against the reference sequences used to build the model with blastx.  
525 The ROcker models were used to filter matches, which were subsequently divided by the  
526 median reference gene length in order to calculate sequencing coverage and were then  
527 normalized for genome equivalents as described below. Correlation between abundances of  
528 antibiotic production and resistance genes was determined using linear regression.

529 *Quantification of genome equivalents (GE):* Average genome size and genome sequencing depth

530 (i.e., the average sequencing depth of single copy genes) were determined for each sample using  
531 MicrobeCensus v1.0.6 with default parameters (62). The sequencing depth of reference genes  
532 with a given annotation was estimated for each dataset (in reads/bp), then divided by the  
533 corresponding average genome sequencing depth and summed to give the total GEs per sample.



534 *Mash and multivariate analysis*: MASH v1.0.2 (63) was used to assess overall whole-community  
535 similarity among metagenomes in a reference database-independent approach (Options: -s  
536 100000). Functional gene and 16S rRNA gene-based OTU count matrices were median-  
537 normalized using the R package DESeq2 (v.1.16.1; (64)). Pairwise Bray-Curtis and weighted  
538 UniFrac (16S only) dissimilarity indexes of the normalized counts were used for principal  
539 component analysis (PCA) and non-metric multidimensional scaling (NMDS) analysis in order  
540 to assess whole-community gene functional and taxonomic (16S rRNA gene OTUs) similarity.  
541 The significance of metadata parameters on the NMDS ordinations was performed using the  
542 `ecodist` and `envfit` functions of the R package `vegan` v2.4.4 (indices included: location, sampling  
543 time, ddPCR counts for STEC, same day precipitation, 5-day precipitation, solar radiation, air  
544 temp, soil temp, and humidity). The two west Salinas samples (WS1 and WS2) were excluded  
545 from this analysis in order to minimize confounding variation of temporal and spatial  
546 differences. In order to control for spatial variance, a more rigorous distance-based redundancy  
547 analysis (db-RDA; (30)) was used to investigate the correlation to metadata using the `capscale`  
548 function in the R package `vegan` (included same indices as above, but with `Condition(location)`  
549 constraint on ordinations).

550 *In-silico detection of E.coli in sample metagenomes*: The presence of any *E. coli* in the  
551 metagenomes was determined using a `blastn` search of short reads against an STEC reference  
552 genome (accession NC\_002695) that had been filtered to remove non-diagnostic (i.e. highly  
553 conserved among phyla) regions with `MyTaxa` (65). Only matches with nucleotide identity  
554 >95% and alignment length >97% were used to calculate relative abundance of *E. coli* in the  
555 metagenomes. This level of sequence diversity (nucleotide identity >95%) encompasses well the  
556 diversity within the *E. coli-Shigella spp.* group; thus, any *E. coli* populations present in the

557 metagenomes at high enough abundance would be detected at this filtering cutoff. The best hit  
558 output from blastn was also analyzed with imGLAD (31), a tool that can estimate the probability  
559 of presence and limit of detection of a reference/target genome in a metagenome.

560 *Determination of differentially abundant (DA) taxa and gene functions:* Functional annotations  
561 of the recovered protein sequences were summarized into several hierarchical ranks including  
562 metabolic pathways and individual protein families based on the SEED classification system  
563 (66). The 16S rRNA gene OTUs were placed into taxonomic groups based on the lowest rank of  
564 taxonomic classification (genus, family etc.) shared by 90% or more of the sequences within the  
565 OTU using MacQIIME v.1.9.1 (51). DA functional annotation terms (subsystems) or OTUs were  
566 identified in samples grouped by location (e.g., pairwise comparison of all 10 TOWOSR vs. all  
567 10 GABOSR and vs. all 5 upstream “pristine control” sites) using the negative binomial test and  
568 false discovery rate ( $P_{\text{adj}} < 0.05$ ) as implemented in DESeq2 v1.16.1 (64). Subsystems with  $\text{Log}_2$   
569 fold change (L2FC)  $> 1$  or taxa with L2FC  $> 2$  were manually grouped into broader categories  
570 based on known functional or taxonomic similarities, respectively (Figures 3 & S7), which were  
571 then normalized by library size (per million read library). A larger L2FC cutoff was used for taxa  
572 to account for the larger dataset size and allow for inspection of the taxa contributing most to  
573 differential abundance between the locations. The taxonomic assignment of these DA taxa were  
574 confirmed against the SILVA database (downloaded October 2018; (67)). Each subsystem or  
575 taxonomic category was then divided by its average sequencing depth across all samples to  
576 provide unbiased counts for presentation purposes.

577 *Comparison of putative anthropogenic signals observed in California sediments to metagenomes*  
578 *from other environments:* Publicly available metagenomes from other studies were used to  
579 compare abundances of reads annotated as ARG, HG, and cow gut with the results obtained for

580 the California sediment datasets reported here. These metagenomes included: three Montana  
581 River sediments (MT; (20)), two temperate agricultural soils from Illinois (Hav and Urb; (68)),  
582 an Alaskan tundra soil (AK; (69)), one sample from the Ganges River near Agra, Uttar Pradesh  
583 (Agra; (45)), and one from the Kalamas River in Greece (Kal; (39)). Short read metagenomes for  
584 MT samples were downloaded from MG-RAST ((70); MG-RAST IDs: 4481974.3, 4481983.3,  
585 4481956.3). The remaining datasets were obtained from the NCBI short read archive (SRA)  
586 database (Hav: ERR1939174, Urb: ERR1939274, AK: ERR1035437, Agra: SRR6337690, Kal:  
587 SRR3098772 ). Reads from these metagenomes were comparable to the ones from this study  
588 (100 – 150bp paired-end Illumina sequencing) and underwent the same trimming, annotation  
589 (against the CARD, HG, and cow gut databases only) and gene count normalization protocol as  
590 described above. The Kruskal-Wallis test in R was performed to determine significantly different  
591 mean abundances between groups . Alpha diversity and taxonomic comparisons were performed  
592 (for MT datasets only) based on metagenomic reads encoding fragments of the 16S rRNA gene,  
593 which were identified as described above.

## References

1. Cooley M, Carychao D, Crawford-Miksza L, Jay MT, Myers C, Rose C, Keys C, Farrar J, Mandrell RE. 2007. Incidence and Tracking of *Escherichia coli* O157:H7 in a Major Produce Production Region in California. *PLoS ONE* 2:e1159.
2. Mantha S, Anderson A, Acharya SP, Harwood VJ, Weidhaas J. 2017. Transport and attenuation of *Salmonella enterica*, fecal indicator bacteria and a poultry litter marker gene are correlated in soil columns. *Sci Total Environ* 598:204–212.
3. Jay MT, Cooley M, Carychao D, Wiscomb GW, Sweitzer RA, Crawford-Miksza L, Farrar JA, Lau DK, O’Connell J, Millington A, Asmundson RV, Atwill ER, Mandrell RE. 2007. *Escherichia coli* O157:H7 in feral swine near spinach fields and cattle, central California coast. *Emerging Infect Dis* 13:1908–1911.
4. Soller JA, Schoen ME, Bartrand T, Ravenscroft JE, Ashbolt NJ. 2010. Estimated human health risks from exposure to recreational waters impacted by human and non-human sources of faecal contamination. *Water Res* 44:4674–4691.
5. Probert WS, Miller GM, Ledin KE. 2017. Contaminated Stream Water as Source for *Escherichia coli* O157 Illness in Children. *Emerging Infect Dis* 23:1216–1218.
6. WHO. 2014. Antimicrobial Resistance: An Emerging Water, Sanitation and Hygiene Issue.
7. Landers TF, Cohen B, Wittum TE, Larson EL. 2012. A Review of Antibiotic Use in Food Animals: Perspective, Policy, and Potential. *Public Health Reports (1974-)* 127:4–22.
8. Jechalke S, Kopmann C, Rosendahl I, Groeneweg J, Weichelt V, Krögerrecklenfort E, Brandes N, Nordwig M, Ding G-C, Siemens J, Heuer H, Smalla K. 2013. Increased Abundance and

- Transferability of Resistance Genes after Field Application of Manure from Sulfadiazine-Treated Pigs. *Appl Environ Microbiol* 79:1704–1711.
9. Zhu Y-G, Johnson TA, Su J-Q, Qiao M, Guo G-X, Stedtfeld RD, Hashsham SA, Tiedje JM. 2013. Diverse and abundant antibiotic resistance genes in Chinese swine farms. *Proceedings of the National Academy of Sciences* 110:3435–3440.
  10. Karkman A, Pärnänen K, Larsson DGJ. 2018. Fecal pollution explains antibiotic resistance gene abundances in anthropogenically impacted environments.
  11. Walsh TR, Weeks J, Livermore DM, Toleman MA. 2011. Dissemination of NDM-1 positive bacteria in the New Delhi environment and its implications for human health: an environmental point prevalence study. *The Lancet Infectious Diseases* 11:355–362.
  12. Maal-Bared R, Bartlett KH, Bowie WR, Hall ER. 2013. Phenotypic antibiotic resistance of *Escherichia coli* and *E. coli* O157 isolated from water, sediment and biofilms in an agricultural watershed in British Columbia. *Sci Total Environ* 443:315–323.
  13. Durso LM, Cook KL. 2014. Impacts of antibiotic use in agriculture: what are the benefits and risks? *Current Opinion in Microbiology* 19:37–44.
  14. Berendonk TU, Manaia CM, Merlin C, Fatta-Kassinos D, Cytryn E, Walsh F, Bürgmann H, Sørum H, Norström M, Pons M-N, Kreuzinger N, Huovinen P, Stefani S, Schwartz T, Kisand V, Baquero F, Martinez JL. 2015. Tackling antibiotic resistance: the environmental framework. *Nature Reviews Microbiology* 13:310–317.
  15. Cooley MB, Jay-Russell M, Atwill ER, Carychao D, Nguyen K, Quiñones B, Patel R, Walker S, Swimley M, Pierre-Jerome E, Gordus AG, Mandrell RE. 2013. Development of a robust method for

- isolation of shiga toxin-positive *Escherichia coli* (STEC) from fecal, plant, soil and water samples from a leafy greens production region in California. *PLoS ONE* 8:e65716.
16. Cooley MB, Quiñones B, Oryang D, Mandrell RE, Gorski L. 2014. Prevalence of shiga toxin producing *Escherichia coli*, *Salmonella enterica*, and *Listeria monocytogenes* at public access watershed sites in a California Central Coast agricultural region. *Front Cell Infect Microbiol* 4:30.
  17. Dorner SM, Anderson WB, Slawson RM, Kouwen N, Huck PM. 2006. Hydrologic modeling of pathogen fate and transport. *Environ Sci Technol* 40:4746–4753.
  18. Petit F, Clermont O, Delannoy S, Servais P, Gourmelon M, Fach P, Oberlé K, Fournier M, Denamur E, Berthe T. 2017. Change in the Structure of *Escherichia coli* Population and the Pattern of Virulence Genes along a Rural Aquatic Continuum. *Frontiers in Microbiology* 8:609.
  19. Cooley MB, Carychao D, Gorski L. 2018. Optimized Co-extraction and Quantification of DNA From Enteric Pathogens in Surface Water Samples Near Produce Fields in California. *Front Microbiol* 9:448.
  20. Gibbons SM, Jones E, Bearquiver A, Blackwolf F, Roundstone W, Scott N, Hooker J, Madsen R, Coleman ML, Gilbert JA. 2014. Human and Environmental Impacts on River Sediment Microbial Communities. *PLoS ONE* 9:e97435. MG-RAST <http://www.mg-rast.org/mgmain.html?mgpage=project&project=mgp305> (MG-RAST IDs: 4481974.3, 4481983.3, and 4481956.3) *{Accession number}*
  21. Abia ALK, Alisoltani A, Keshri J, Ubomba-Jaswa E. 2018. Metagenomic analysis of the bacterial communities and their functional profiles in water and sediments of the Apies River, South Africa, as a function of land use. *Sci Total Environ* 616–617:326–334.

22. Bowen. 2011. Microbial community composition in sediments resists perturbation by nutrient enrichment | The ISME Journal.
23. Xu M, Zhang Q, Xia C, Zhong Y, Sun G, Guo J, Yuan T, Zhou J, He Z. 2014. Elevated nitrate enriches microbial functional genes for potential bioremediation of complexly contaminated sediments. *The ISME Journal* 8:1932–1944.
24. Costa PS, Reis MP, Ávila MP, Leite LR, de Araújo FMG, Salim ACM, Oliveira G, Barbosa F, Chartone-Souza E, Nascimento AMA. 2015. Metagenome of a Microbial Community Inhabiting a Metal-Rich Tropical Stream Sediment. *PLoS One* 10.
25. Graves CJ, Makrides EJ, Schmidt VT, Giblin AE, Cardon ZG, Rand DM. 2016. Functional Responses of Salt Marsh Microbial Communities to Long-Term Nutrient Enrichment. *Applied and Environmental Microbiology* 82:2862–2871.
26. Negi V, Lal R. 2017. Metagenomic Analysis of a Complex Community Present in Pond Sediment. *J Genomics* 5:36–47.
27. Huber DH, Ugwuanyi IR, Malkaram SA, Montenegro-Garcia NA, Lhilhi Noundou V, Chavarria-Palma JE. 2018. Metagenome Sequences of Sediment from a Recovering Industrialized Appalachian River in West Virginia. *Genome Announc* 6.
28. D’Costa VM, King CE, Kalan L, Morar M, Sung WWL, Schwarz C, Froese D, Zazula G, Calmels F, Debruyne R, Golding GB, Poinar HN, Wright GD. 2011. Antibiotic resistance is ancient. *Nature* 477:457–461.
29. Rodriguez-R LM, Konstantinidis KT. 2014. Nonpareil: a redundancy-based approach to assess the level of coverage in metagenomic datasets. *Bioinformatics* 30:629–635.

30. Legendre P, Anderson MJ. 1999. DISTANCE-BASED REDUNDANCY ANALYSIS: TESTING MULTISPECIES RESPONSES IN MULTIFACTORIAL ECOLOGICAL EXPERIMENTS. *Ecological Monographs* 69:1–24.
31. Castro JC, Rodriguez-R LM, Harvey WT, Weigand MR, Hatt JK, Carter MQ, Konstantinidis KT. 2018. imGLAD: accurate detection and quantification of target organisms in metagenomes. *PeerJ* 6.
32. McArthur AG, Waglechner N, Nizam F, Yan A, Azad MA, Baylay AJ, Bhullar K, Canova MJ, De Pascale G, Ejim L, Kalan L, King AM, Koteva K, Morar M, Mulvey MR, O'Brien JS, Pawlowski AC, Piddock LJV, Spanogiannopoulos P, Sutherland AD, Tang I, Taylor PL, Thaker M, Wang W, Yan M, Yu T, Wright GD. 2013. The comprehensive antibiotic resistance database. *Antimicrob Agents Chemother* 57:3348–3357.
33. Orellana LH, Rodriguez-R LM, Konstantinidis KT. 2017. ROCKER: accurate detection and quantification of target genes in short-read metagenomic data sets by modeling sliding-window bitscores. *Nucleic Acids Res* 45:e14–e14.
34. US-FDA. 2015. Antimicrobials Sold or Distributed for Use in Food-Producing Animals. Food and Drug Administration: Department of Health and Human Services.
35. Morlon H, O'Connor TK, Bryant JA, Charkoudian LK, Docherty KM, Jones E, Kembel SW, Green JL, Bohannan BJM. 2015. The Biogeography of Putative Microbial Antibiotic Production. *PLoS ONE* 10:e0130659.
36. Salyers AA, Shoemaker NB, Stevens AM, Li LY. 1995. Conjugative transposons: an unusual and diverse set of integrated gene transfer elements. *Microbiol Rev* 59:579–590.
37. Roberts MC. 2005. Update on acquired tetracycline resistance genes. *FEMS Microbiol Lett* 245:195–203.



38. Van Rossum T, Peabody MA, Uyaguari-Diaz MI, Cronin KI, Chan M, Slobodan JR, Nesbitt MJ, Suttle CA, Hsiao WWL, Tang PKC, Prystajec NA, Brinkman FSL. 2015. Year-Long Metagenomic Study of River Microbiomes Across Land Use and Water Quality. *Front Microbiol* 6.
39. Meziti A, Tsementzi D, Ar. Kormas K, Karayanni H, Konstantinidis KT. 2016. Anthropogenic effects on bacterial diversity and function along a river-to-estuary gradient in Northwest Greece revealed by metagenomics: Diversity patterns along a river-to-estuary gradient. *Environmental Microbiology* 18:4640–4652. SRA <https://www.ncbi.nlm.nih.gov/sra/?term=SRR3098772> (accession no. SRR3098772). *{Accession number.}*
40. Chen B, Liang X, Huang X, Zhang T, Li X. 2013. Differentiating anthropogenic impacts on ARGs in the Pearl River Estuary by using suitable gene indicators. *Water Research* 47:2811–2820.
41. Allen HK, Moe LA, Rodbumrer J, Gaarder A, Handelsman J. 2009. Functional metagenomics reveals diverse beta-lactamases in a remote Alaskan soil. *ISME J* 3:243–251.
42. Cytryn E. 2013. The soil resistome: The anthropogenic, the native, and the unknown. *Soil Biology and Biochemistry Complete*:18–23.
43. Yang J, Wang C, Shu C, Liu L, Geng J, Hu S, Feng J. 2013. Marine Sediment Bacteria Harbor Antibiotic Resistance Genes Highly Similar to Those Found in Human Pathogens. *Microb Ecol* 65:975–981.
44. Martín MF, Liras P. 1989. Organization and expression of genes involved in the biosynthesis of antibiotics and other secondary metabolites. *Annu Rev Microbiol* 43:173–206.
45. Zhang S-Y, Tsementzi D, Hatt JK, Bivins A, Khelurkar N, Brown J, Tripathi SN, Konstantinidis KT. 2019. Intensive allochthonous inputs along the Ganges River and their effect on microbial community composition and dynamics. *Environ Microbiol* 21:182–196. SRA

<https://www.ncbi.nlm.nih.gov/sra/?term=SRR6337690> (accession no. SRR6337690). *{Accession number.}*

46. Johnston ER, Kim M, Hatt JK, Phillips JR, Yao Q, Song Y, Hazen TC, Mayes MA, Konstantinidis KT. 2019. Phosphate addition increases tropical forest soil respiration primarily by deconstraining microbial population growth. *Soil Biology and Biochemistry* 130:43–54.
47. Rodriguez-R LM, Overholt WA, Hagan C, Huettel M, Kostka JE, Konstantinidis KT. 2015. Microbial community successional patterns in beach sands impacted by the Deepwater Horizon oil spill. *The ISME Journal* 9:1928–1940.
48. Peng Y, Leung HCM, Yiu SM, Chin FYL. 2012. IDBA-UD: a de novo assembler for single-cell and metagenomic sequencing data with highly uneven depth. *Bioinformatics* 28:1420–1428.
49. Su X, Pan W, Song B, Xu J, Ning K. 2014. Parallel-META 2.0: Enhanced Metagenomic Data Analysis with Functional Annotation, High Performance Computing and Advanced Visualization. *PLOS ONE* 9:e89323.
50. DeSantis TZ, Hugenholtz P, Larsen N, Rojas M, Brodie EL, Keller K, Huber T, Dalevi D, Hu P, Andersen GL. 2006. Greengenes, a chimera-checked 16S rRNA gene database and workbench compatible with ARB. *Appl Environ Microbiol* 72:5069–5072.
51. Caporaso JG, Kuczynski J, Stombaugh J, Bittinger K, Bushman FD, Costello EK, Fierer N, Peña AG, Goodrich JK, Gordon JI, Huttley GA, Kelley ST, Knights D, Koenig JE, Ley RE, Lozupone CA, McDonald D, Muegge BD, Pirrung M, Reeder J, Sevinsky JR, Turnbaugh PJ, Walters WA, Widmann J, Yatsunencko T, Zaneveld J, Knight R. 2010. QIIME allows analysis of high-throughput community sequencing data. *Nat Methods* 7:335–336.

52. Edgar RC. 2010. Search and clustering orders of magnitude faster than BLAST. *Bioinformatics* 26:2460–2461.
53. Chao A, Shen T-J. 2003. Nonparametric estimation of Shannon’s index of diversity when there are unseen species in sample. *Environmental and Ecological Statistics* 10:429–443.
54. Hausser J, Strimmer K. Entropy Inference and the James-Stein Estimator, with Application to Nonlinear Gene Association Networks 16.
55. Chao A. 1984. Nonparametric Estimation of the Number of Classes in a Population. *Scandinavian Journal of Statistics* 11:265–270.
56. UniProt Consortium. 2017. UniProt: the universal protein knowledgebase. *Nucleic Acids Res* 45:D158–D169.
57. Buchfink B, Xie C, Huson DH. 2015. Fast and sensitive protein alignment using DIAMOND. *Nature Methods* 12:59–60.
58. Rho M, Tang H, Ye Y. 2010. FragGeneScan: predicting genes in short and error-prone reads. *Nucleic Acids Res* 38:e191.
59. Camacho C, Coulouris G, Avagyan V, Ma N, Papadopoulos J, Bealer K, Madden TL. 2009. BLAST+: architecture and applications. *BMC Bioinformatics* 10:421.
60. Fu L, Niu B, Zhu Z, Wu S, Li W. 2012. CD-HIT: accelerated for clustering the next-generation sequencing data. *Bioinformatics* 28:3150–3152.
61. MetaHIT Consortium, Li J, Jia H, Cai X, Zhong H, Feng Q, Sunagawa S, Arumugam M, Kultima JR, Prifti E, Nielsen T, Juncker AS, Manichanh C, Chen B, Zhang W, Levenez F, Wang J, Xu X, Xiao L, Liang S, Zhang D, Zhang Z, Chen W, Zhao H, Al-Aama JY, Edris S, Yang H, Wang J,

- Hansen T, Nielsen HB, Brunak S, Kristiansen K, Guarner F, Pedersen O, Doré J, Ehrlich SD, Bork P, Wang J. 2014. An integrated catalog of reference genes in the human gut microbiome. *Nature Biotechnology* 32:834–841.
62. Nayfach S, Pollard KS. 2015. Average genome size estimation improves comparative metagenomics and sheds light on the functional ecology of the human microbiome. *Genome Biology* 16:51.
63. Ondov BD, Treangen TJ, Melsted P, Mallonee AB, Bergman NH, Koren S, Phillippy AM. 2016. Mash: fast genome and metagenome distance estimation using MinHash. *Genome Biology* 17:132.
64. Anders S, Huber W. 2010. Differential expression analysis for sequence count data. *Genome Biology* 11:R106.
65. Luo C, Rodriguez-R LM, Konstantinidis KT. 2014. MyTaxa: an advanced taxonomic classifier for genomic and metagenomic sequences. *Nucleic Acids Res* 42:e73.
66. Overbeek R, Begley T, Butler RM, Choudhuri JV, Chuang H-Y, Cohoon M, de Crécy-Lagard V, Diaz N, Disz T, Edwards R, Fonstein M, Frank ED, Gerdes S, Glass EM, Goesmann A, Hanson A, Iwata-Reuyl D, Jensen R, Jamshidi N, Krause L, Kubal M, Larsen N, Linke B, McHardy AC, Meyer F, Neuweger H, Olsen G, Olson R, Osterman A, Portnoy V, Pusch GD, Rodionov DA, Rückert C, Steiner J, Stevens R, Thiele I, Vassieva O, Ye Y, Zagnitko O, Vonstein V. 2005. The Subsystems Approach to Genome Annotation and its Use in the Project to Annotate 1000 Genomes. *Nucleic Acids Res* 33:5691–5702.
67. Yilmaz P, Parfrey LW, Yarza P, Gerken J, Pruesse E, Quast C, Schweer T, Peplies J, Ludwig W, Glöckner FO. 2014. The SILVA and “All-species Living Tree Project (LTP)” taxonomic frameworks. *Nucleic Acids Res* 42:D643–D648.

68. Orellana LH, Chee-Sanford JC, Sanford RA, Löffler FE, Konstantinidis KT. 2018. Year-Round Shotgun Metagenomes Reveal Stable Microbial Communities in Agricultural Soils and Novel Ammonia Oxidizers Responding to Fertilization. *Appl Environ Microbiol* 84. SRA <https://www.ncbi.nlm.nih.gov/Traces/study/?acc=ERP022181> (accession nos. ERR1939174 and ERR1939274). *{Accession numbers.}*
69. Johnston ER, Rodriguez-R LM, Luo C, Yuan MM, Wu L, He Z, Schuur EAG, Luo Y, Tiedje JM, Zhou J, Konstantinidis KT. 2016. Metagenomics Reveals Pervasive Bacterial Populations and Reduced Community Diversity across the Alaska Tundra Ecosystem. *Frontiers in Microbiology* 7. SRA <https://www.ncbi.nlm.nih.gov/sra/?term=ERR1035437> (accession no. ERR1035437). *{Accession number.}*
70. Keegan KP, Glass EM, Meyer F. 2016. MG-RAST, a Metagenomics Service for Analysis of Microbial Community Structure and Function. *Methods Mol Biol* 1399:207–233.

**Table 1:** Culture-based detection of STEC and precipitation (Precip) data reported in inches

| Sample ID                                | Date Collected | STEC <sup>a</sup> | Copies <i>stx2</i> /ug DNA <sup>b</sup> | Precip | 5-day Precip |
|------------------------------------------|----------------|-------------------|-----------------------------------------|--------|--------------|
| <b>Gabilan at Old Stage (GABOSR)</b>     |                |                   |                                         |        |              |
| G130904                                  | 9/4/13         | -                 | 8.1                                     | 0      | 0            |
| G140116                                  | 1/16/14        | +                 | 8                                       | 0      | 0.01         |
| G140128                                  | 1/28/14        | +                 | 0                                       | 0      | 0            |
| G140210                                  | 2/10/14        | +                 | 4.4                                     | 0.01   | 1.1          |
| G140224                                  | 2/24/14        | +                 | 1.8                                     | 0      | 0            |
| G140301                                  | 3/1/14         | +                 | 1.5                                     | 0.33   | 2.01         |
| G140319                                  | 3/19/14        | -                 | 0                                       | 0      | 0.01         |
| G140402                                  | 4/2/14         | +                 | 1.4                                     | 0.03   | 1.04         |
| G140415                                  | 4/15/14        | -                 | 0                                       | 0      | 0            |
| G140611                                  | 6/11/14        | -                 | 2.4                                     | 0      | 0            |
| <b>Towne Creek at Old Stage (TOWOSR)</b> |                |                   |                                         |        |              |
| T130904                                  | 9/4/13         | -                 | 14.2                                    | 0      | 0            |
| T130918                                  | 9/18/13        | +                 | 15.3                                    | 0      | 0            |
| T131023                                  | 10/23/13       | -                 | 0                                       | 0      | 0            |
| T131230                                  | 12/30/13       | +                 | 3.9                                     | 0      | 0            |
| T140116                                  | 1/16/14        | -                 | 0                                       | 0      | 0.01         |
| T140128                                  | 1/28/14        | +                 | 0                                       | 0      | 0            |
| T140210                                  | 2/10/14        | -                 | 1.7                                     | 0.01   | 1.1          |
| T140224                                  | 2/24/14        | -                 | 1.5                                     | 0      | 0            |
| T140319                                  | 3/19/14        | -                 | 0                                       | 0      | 0.01         |
| T140611                                  | 6/11/14        | -                 | 0                                       | 0      | 0            |
| <b>Upstream GABOSR Control (GC)</b>      |                |                   |                                         |        |              |
| GC1                                      | 3/9/16         | -                 | 0                                       | 0      | 2.84         |
| GC2                                      | 3/9/16         | +                 | 0                                       | 0      | 2.84         |
| GC3                                      | 3/9/16         | -                 | 0                                       | 0      | 2.84         |
| <b>Upstream TOWOSR Control (TC)</b>      |                |                   |                                         |        |              |
| TC1                                      | 4/19/17        | +                 | 0                                       | 0      | 0.45         |
| TC2                                      | 4/19/17        | -                 | 0                                       | 0      | 0.45         |
| <b>West Salinas (WS)</b>                 |                |                   |                                         |        |              |
| WS1                                      | 5/4/17         | -                 | 0                                       | 0      | 0            |
| WS2                                      | 5/4/17         | -                 | 0                                       | 0      | 0            |

<sup>a</sup> Samples in which STEC was detected by PCR of enrichment cultures are listed as either positive (+) or negative (-).

<sup>b</sup> Copy number of the shiga toxin gene (*stx2*) was determined via ddPCR.

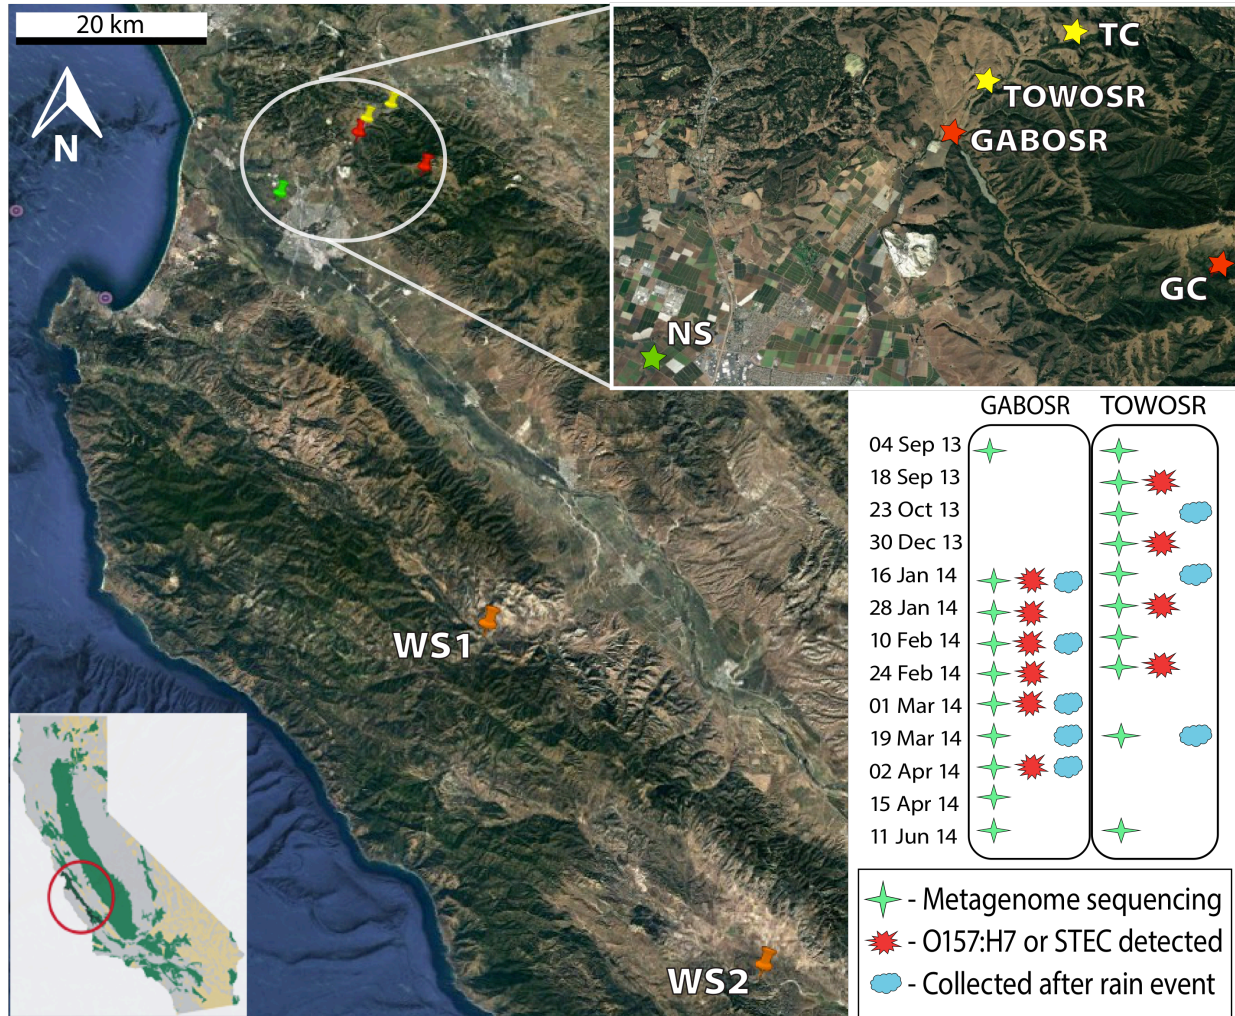

**Figure 1: Location of sampling sites in the Salinas Valley, California and sampling scheme for time-series metagenomics.** Sampling site for Gabilan (GABOSR in red) and Towne Creek (TOWOSR in yellow). The upstream controls for Gabilan (GC) and Towne Creek (TC) are also indicated by the same colors. Orange pins mark the West Salinas sites (WS1 and WS2) included as less agriculturally-impacted controls. The North Salinas weather station (NS; green star) is approximately 11km SE of GABOSR and was the closest weather monitoring station to all samples shown in the subset map. GPS coordinates for all sampling locations are provided in supplementary Table S1. Inset: location of the Salinas Valley in the state of California.

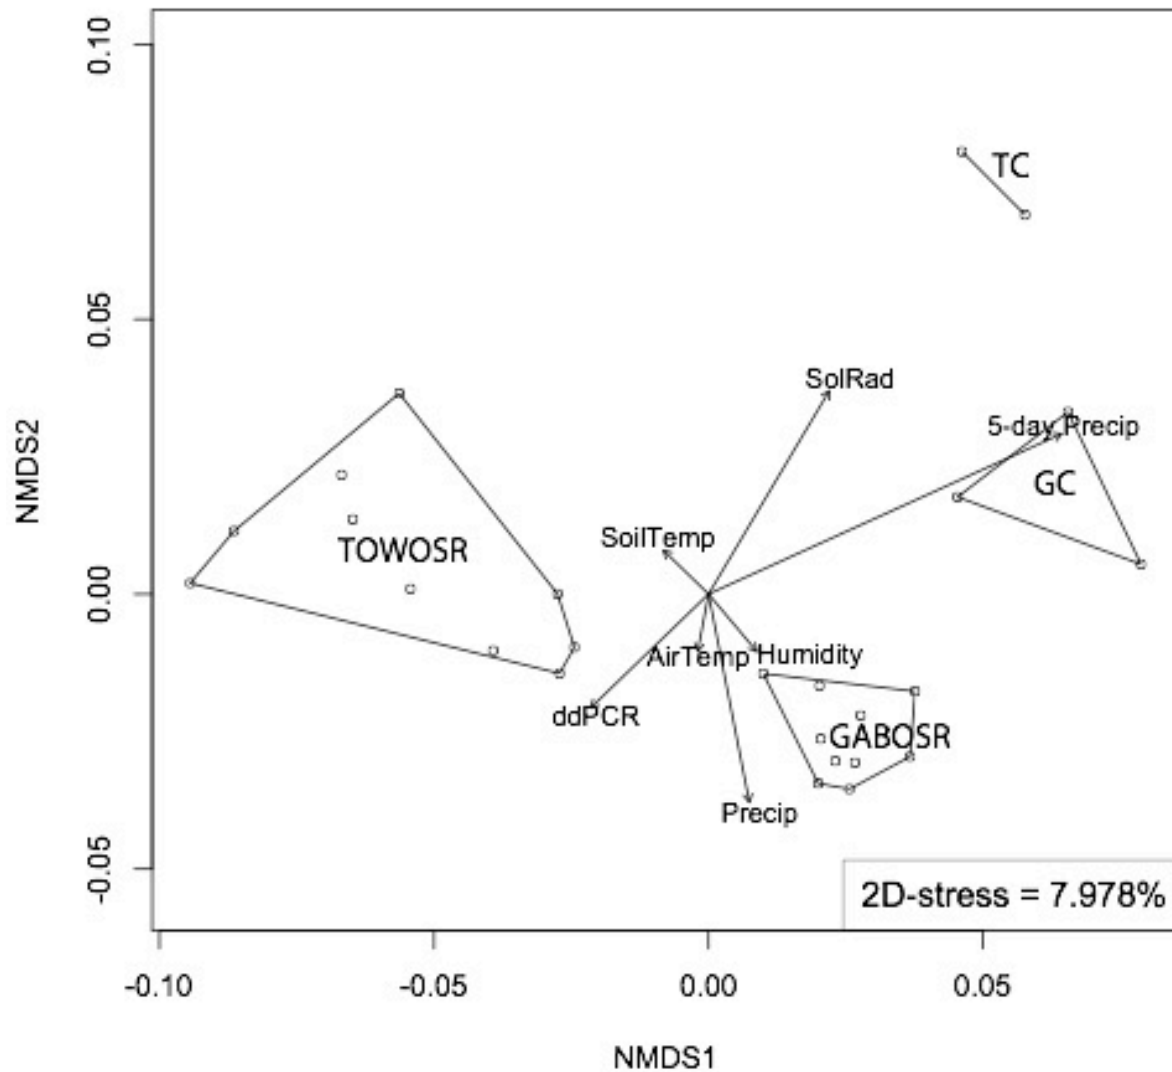

**Figure 2: The effect of environmental parameters on microbial community structure.** The graph shows non-metric multidimensional scaling (NMDS) of the sequenced communities based on whole-community MASH distances. Each dot represents a metagenome sample and those that were more similar to each other are grouped together by connected lines. Arrow vectors indicate correlation to metadata parameters.



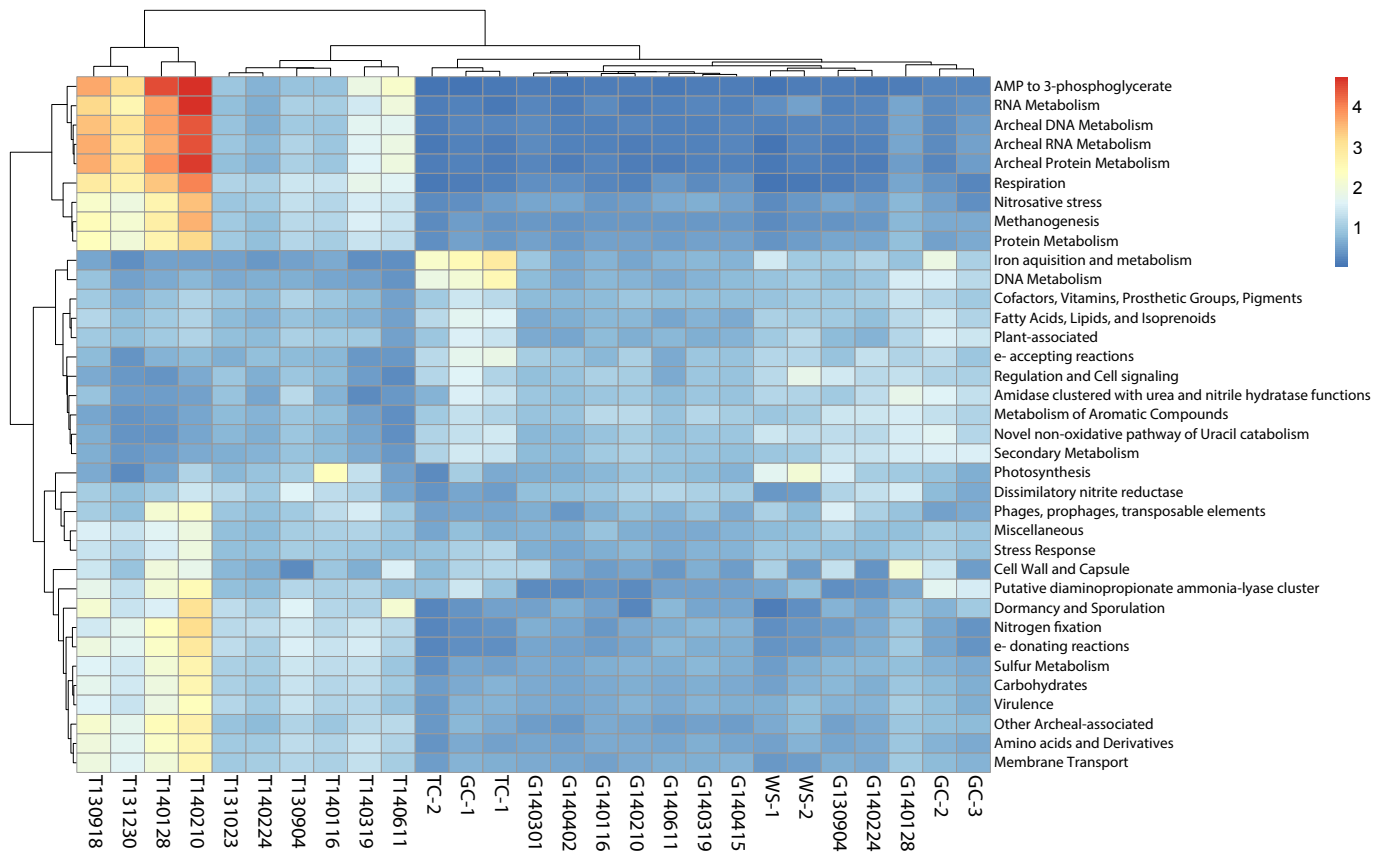

**Figure 3: Functional profiles of creek sediment microbial communities.** The heatmap shows SEED subsystems that were differentially abundant between locations (TOWOSR, GABOSR, and the upstream controls) with  $P_{adj} < 0.05$ . Color scale indicates the abundance relative to the average of all samples (increasing from blue to red).

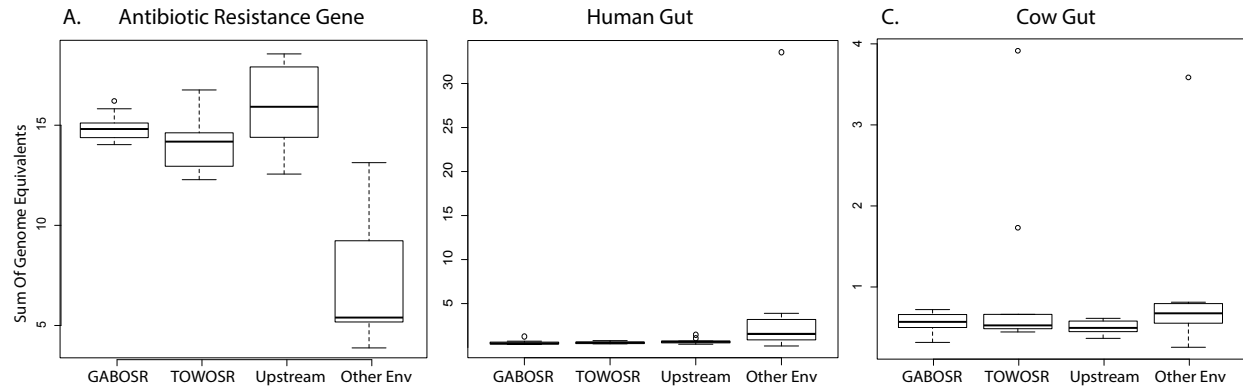

**Figure 4: Abundance of ARG, human gut (HG), and cow gut sequences in the Salinas Valley metagenomes compared to other environmental metagenomes.** The box and whisker plots show the interquartile range for the abundances with open dots indicating samples that exceeded 1.5x the interquartile range. The other environmental metagenomes (Other Env) included: 3 river sediments, 2 agricultural soils, 1 permafrost soil, and 2 river water samples from the Kalamas and Ganges Rivers.

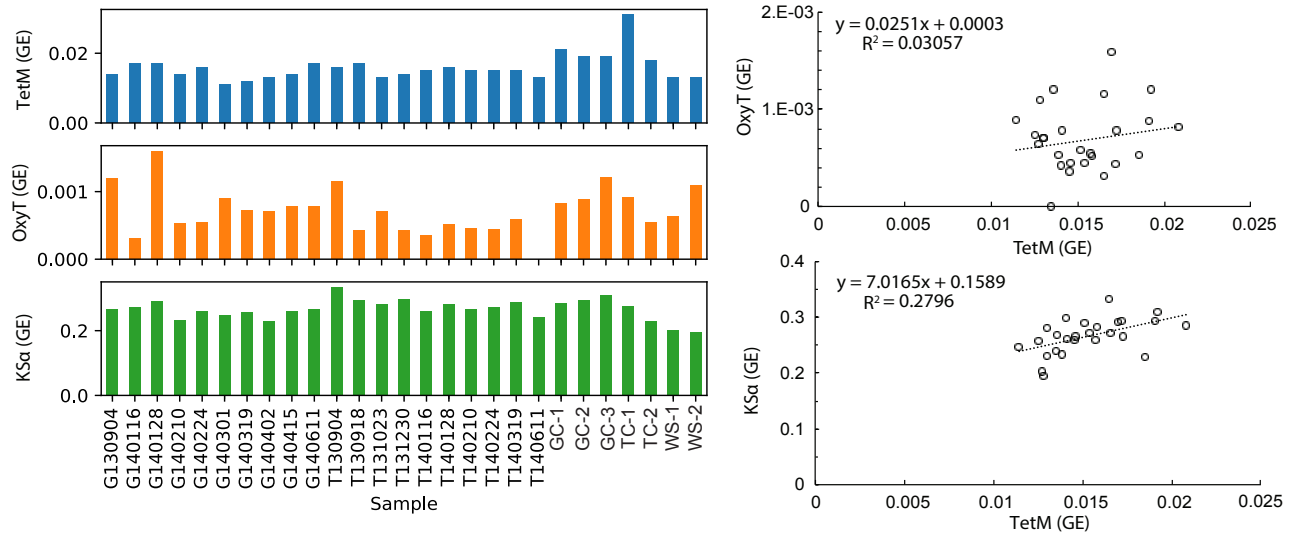

**Figure 5: Abundances of selected antibiotic resistance and production genes in the Salinas Valley metagenomes. (LEFT)** Abundance (expressed as genome equivalents) of *tetM*, *oxyT*, and *KSa* genes for the 27 sites included in this study. **(RIGHT)** Linear regression of *tetM* versus *oxyT* or *KSa* gene abundances. TC1 was an outlier for *tetM* abundance and was removed from this analysis.
